# Supplementary material for: An ion-sieve-tailored biomimetic porous nanofiber as an efficient adsorbent for extraction of lithium from brine
Source: Royal Society of Chemistry journal article supplement (doi:10.1039/d2nj06072h), 2023-01-01
Supplement: d2nj06072h2.pdf [file d2nj06072h2.pdf]

**Table S1.** Concentrations of PVP, metallic salt and solvents in mixed solutions

| Sample NO.   | PVP (wt%) | Metallic salt (wt%) <sup>a</sup> | Solvents (wt%) <sup>b</sup> |
|--------------|-----------|----------------------------------|-----------------------------|
| NFs@LMO-6:1  | 6         | 1                                | 93                          |
| NFs@LMO-6:3  | 6         | 3                                | 91                          |
| NFs@LMO-6:6  | 6         | 6                                | 88                          |
| NFs@LMO-6:12 | 6         | 12                               | 82                          |
| NFs@LMO-9:1  | 9         | 1                                | 90                          |
| NFs@LMO-9:3  | 9         | 3                                | 88                          |
| NFs@LMO-9:6  | 9         | 6                                | 85                          |

<sup>a</sup> Composed of LiClO<sub>4</sub> and Mn(CH<sub>3</sub>COO)<sub>2</sub>·4H<sub>2</sub>O, stoichiometric ratio of 1:1

<sup>b</sup> Composed of methyl alcohol and acetic acid glacial
