# Supplementary material for: An ion-sieve-tailored biomimetic porous nanofiber as an efficient adsorbent for extraction of lithium from brine
Source: Royal Society of Chemistry journal article supplement (doi:10.1039/d2nj06072h), 2023-01-01
Supplement: d2nj06072h3.pdf [file d2nj06072h3.pdf]

**Table S2.** The value of Mn and elemental content analysis for NFs@LMO-6:6

| Sample      | Manganese content (%) | $Z_{Mn}$ |
|-------------|-----------------------|----------|
| NFs@LMO-6:6 | 8.04                  | 3.89     |
