# Supplementary material for: An ion-sieve-tailored biomimetic porous nanofiber as an efficient adsorbent for extraction of lithium from brine
Source: Royal Society of Chemistry journal article supplement (doi:10.1039/d2nj06072h), 2023-01-01
Supplement: d2nj06072h4.pdf [file d2nj06072h4.pdf]

**Table S3.** The pseudo-first-order kinetic model and the pseudo-second-order kinetic model

adsorption kinetic parameters of Li<sup>+</sup> on NFs@LMO-6:6

| Absorbents | Pseudo-first-order kinetic model   |                        |        | Pseudo-second-order kinetic model  |                                                        |        |
|------------|------------------------------------|------------------------|--------|------------------------------------|--------------------------------------------------------|--------|
|            | $Q_1(\text{mg}\cdot\text{g}^{-1})$ | $k_1(\text{min}^{-1})$ | $R^2$  | $Q_2(\text{mg}\cdot\text{g}^{-1})$ | $k_2(\text{g}\cdot\text{mg}^{-1}\cdot\text{min}^{-1})$ | $R^2$  |
| NF@LIS-6:6 | 24.26                              | 0.0536                 | 0.9087 | 25.00                              | 0.0130                                                 | 0.9977 |
