# Supplementary material for: An ion-sieve-tailored biomimetic porous nanofiber as an efficient adsorbent for extraction of lithium from brine
Source: Royal Society of Chemistry journal article supplement (doi:10.1039/d2nj06072h), 2023-01-01
Supplement: d2nj06072h5.pdf [file d2nj06072h5.pdf]

**Table S4.** The adsorption equilibrium constants of Langmuir and Freundlich adsorption isotherm equations

| Adsorbent   | Langmuir model                     |                         |        | Freundlich model |        |        |
|-------------|------------------------------------|-------------------------|--------|------------------|--------|--------|
|             | $Q_m(\text{mg}\cdot\text{g}^{-1})$ | $K_L(\text{L mg}^{-1})$ | $R^2$  | 1/n              | $K_F$  | $R^2$  |
| NFs@LIS-6:6 | 44.64                              | 0.0240                  | 0.9778 | 0.3423           | 6.0912 | 0.9674 |
