# Supplementary material for: An ion-sieve-tailored biomimetic porous nanofiber as an efficient adsorbent for extraction of lithium from brine
Source: Royal Society of Chemistry journal article supplement (doi:10.1039/d2nj06072h), 2023-01-01
Supplement: d2nj06072h6.pdf [file d2nj06072h6.pdf]

**Table S6.** Comparison of adsorption performance of different manganese series lithium-ion sieves

| Adsorbent                                         | Raw material                                                                   | Morphology         | Li <sup>+</sup> solution                                                                                                                         | Equilibrium time | Li adsorption capacity/mg·g <sup>-1</sup> | Manganese dissolution/wt% | Ref.      |
|---------------------------------------------------|--------------------------------------------------------------------------------|--------------------|--------------------------------------------------------------------------------------------------------------------------------------------------|------------------|-------------------------------------------|---------------------------|-----------|
| H <sub>1.6</sub> Mn <sub>1.6</sub> O <sub>4</sub> | Mn(CH <sub>3</sub> COO) <sub>2</sub> ·4H <sub>2</sub> O/<br>LiClO <sub>4</sub> | Nanofibers         | LiCl solution/Brine (Li <sup>+</sup> 200 mg·L <sup>-1</sup> , pH = 9.8±0.1, 12 h/Li <sup>+</sup> 197.54 mg·L <sup>-1</sup> , pH = 7.3±0.1, 12 h) | 40 min           | 37.37/32.43                               | 0.83                      | This work |
| H <sub>1.6</sub> Mn <sub>1.6</sub> O <sub>4</sub> | γ-MnOOH/LiOH                                                                   | Irregular particle | Seawater (Li <sup>+</sup> 5 mg·g <sup>-1</sup> , pH=8, 6 days)                                                                                   | 6 days           | 37                                        | 1.5                       | 9         |
| H <sub>1.6</sub> Mn <sub>1.6</sub> O <sub>4</sub> | γ-MnOOH/LiOH                                                                   | Irregular particle | Seawater (Li <sup>+</sup> 0.17 mg·g <sup>-1</sup> , pH=8, 4 weeks)                                                                               | 4 weeks          | 36.1                                      | 2.5                       | 4         |
| H <sub>1.6</sub> Mn <sub>1.6</sub> O <sub>4</sub> | -                                                                              | -                  | Brine (Li <sup>+</sup> 1600 mg·L <sup>-1</sup> , pH=6.6, 8 h)                                                                                    | 8 h              | 32                                        | 0.5                       | 3         |
| H <sub>1.6</sub> Mn <sub>1.6</sub> O <sub>4</sub> | (KMnO <sub>4</sub> , MnCl <sub>2</sub> )/LiOH                                  | Irregular particle | Salt lake (Li <sup>+</sup> 1.79×10 <sup>4</sup> mg·L <sup>-1</sup> , pH=6.4, 48 h)                                                               | 48 h             | 28.6                                      | 1.2                       | 10        |
| H <sub>1.6</sub> Mn <sub>1.6</sub> O <sub>4</sub> | γ-MnOOH/LiOH·H <sub>2</sub> O                                                  | Rod-like           | Brine (Li <sup>+</sup> 182 mg·L <sup>-1</sup> , pH =                                                                                             | 12 h             | 30.20                                     | 2.2                       | 5         |

|                      |                                          |                           |                                                                                                 |      |             |     |    |
|----------------------|------------------------------------------|---------------------------|-------------------------------------------------------------------------------------------------|------|-------------|-----|----|
|                      |                                          |                           | 8, 12 h)                                                                                        |      |             |     |    |
| $H_{1.6}Mn_{1.6}O_4$ | $MnCO_3/LiNO_3$                          | Spherical                 | Brine ( $Li^+$ 182 $mg \cdot L^{-1}$ , pH = 8, 12 h)                                            | 12 h | 33.10       | 1.6 | 5  |
| $H_{1.6}Mn_{1.6}O_4$ | $MnO/LiOH \cdot H_2O$                    | Flower-like               | Brine ( $Li^+$ 182 $mg \cdot L^{-1}$ , pH = 8, 12 h)                                            | 12 h | 31.47       | 2.4 | 5  |
| $H_{1.6}Mn_{1.6}O_4$ | $Mn(CH_3COO)_2 \cdot 4H_2O/LiNO_3$       | 3D macroporous-mesoporous | Brine ( $Li^+$ 182 $mg \cdot L^{-1}$ , pH = 8, 12 h)                                            | 12 h | 42.15       | 3.5 | 5  |
| $HMn_2O_4$           | $Mn(CH_3COO)_2 \cdot 4H_2O/LiNO_3$       | Nanofibers                | Mixed solution of LiCl and LiOH ( $Li^+$ 200 $mg \cdot L^{-1}$ , pH = 11, 24 h)                 | 24 h | 34.21       | -   | 1  |
| $HMn_2O_4$           | $Mn(CH_3COO)_2 \cdot 2H_2O/LiNO_3$       | Nanofibers                | Li solution/Seawater ( $Li^+$ 100 $mg \cdot L^{-1}/Li^+$ 0.17 $mg \cdot L^{-1}$ , pH = 8, 24 h) | 24 h | 32.50/18.81 | -   | 2  |
| $HMn_2O_4$           | $Mn(NO_3)_2/LiOH$                        | Particle                  | Li solution ( $Li^+$ 69.41 $mg \cdot L^{-1}$ , pH = 10.10, 72 h)                                | 24 h | 20.47       | -   | 11 |
| $H_{1.6}Mn_{1.6}O_4$ | $Mn(NO_3)_2 \cdot 4H_2O/LiOH \cdot H_2O$ | Particle                  | LiCl solution ( $Li^+$ 6.08 $mg \cdot L^{-1}$ , pH = 12, 48 h)                                  | 4 h  | 24.7        | -   | 6  |
