# Supplementary material for: An ion-sieve-tailored biomimetic porous nanofiber as an efficient adsorbent for extraction of lithium from brine
Source: Royal Society of Chemistry journal article supplement (doi:10.1039/d2nj06072h), 2023-01-01
Supplement: d2nj06072h7.pdf [file d2nj06072h7.pdf]

**Table S7.** Compositions of artificial brine (mg·L<sup>-1</sup>)

|       | Li <sup>+</sup> | Na <sup>+</sup> | K <sup>+</sup> | Ca <sup>2+</sup> | Mg <sup>2+</sup> |
|-------|-----------------|-----------------|----------------|------------------|------------------|
| Brine | 197.54          | 2532.8          | 1259.9         | 37.50            | 10700.0          |
